# Supplementary material
Source: PubMed Central journal article supplement (PMC5583483)
Supplement: AEM.01014-17_zam999118036s1.pdf [file AEM.01014-17_zam999118036s1.pdf]

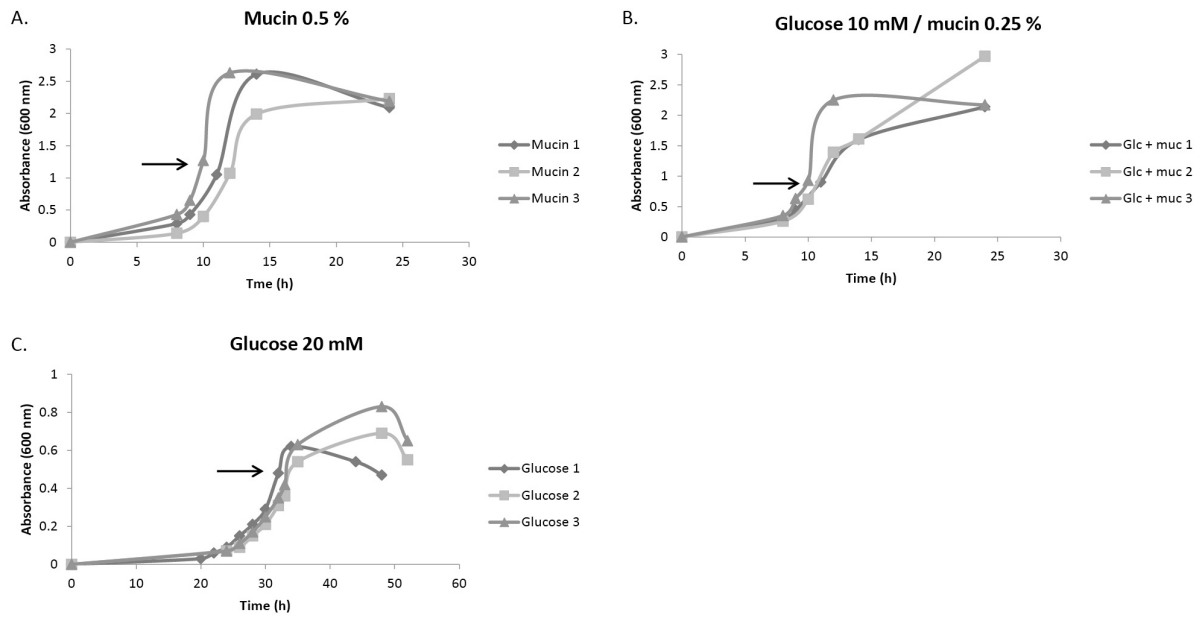

**FIG S1. *A. muciniphila* cultures were harvested in mid-exponential phase for RNA-extraction. *A. muciniphila* was grown on mucin (A), a mixture of glucose and mucin (B), or glucose (C). Three replicates of each condition were sampled. Arrows indicate time points for sampling.**

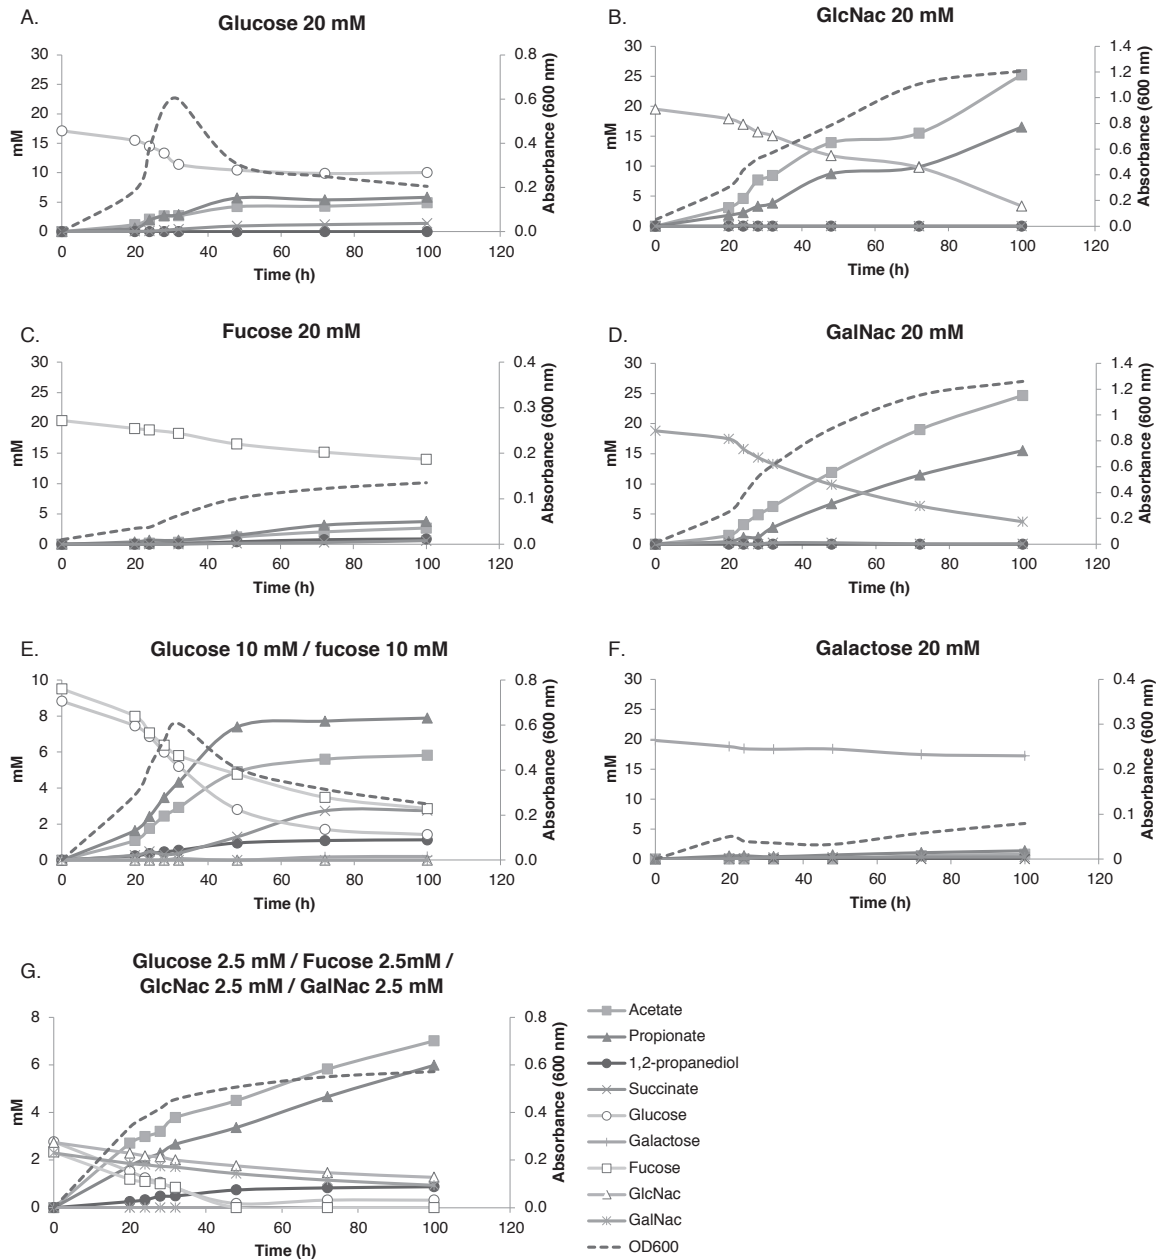

**FIG S2. *A. muciniphila* utilization of glucose and mucin-derived sugars.** *A. muciniphila* is able to efficiently grow on glucose, N-acetylglucosamine (GlcNAc) and N-acetylgalactosamine (GalNAc). Highest yields are reached when grown on GlcNAc or GalNAc. Galactose and fucose degradation by *A. muciniphila* is weak. However, in a mixture glucose and fucose are the preferred substrates. Values represent mean of three replicate experiments.

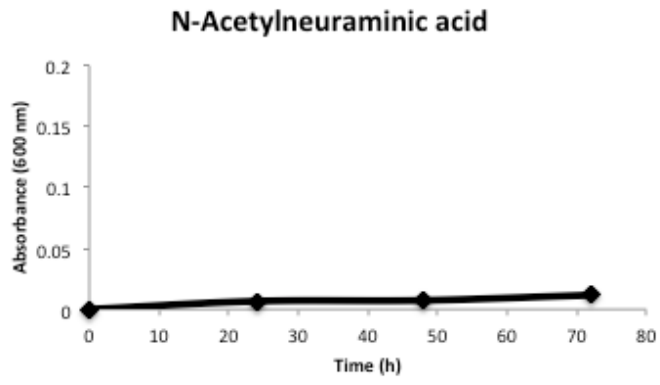

**FIG S3. *A. muciniphila* is not able to grow on N-acetylneuraminic acid as the sole carbon source.**

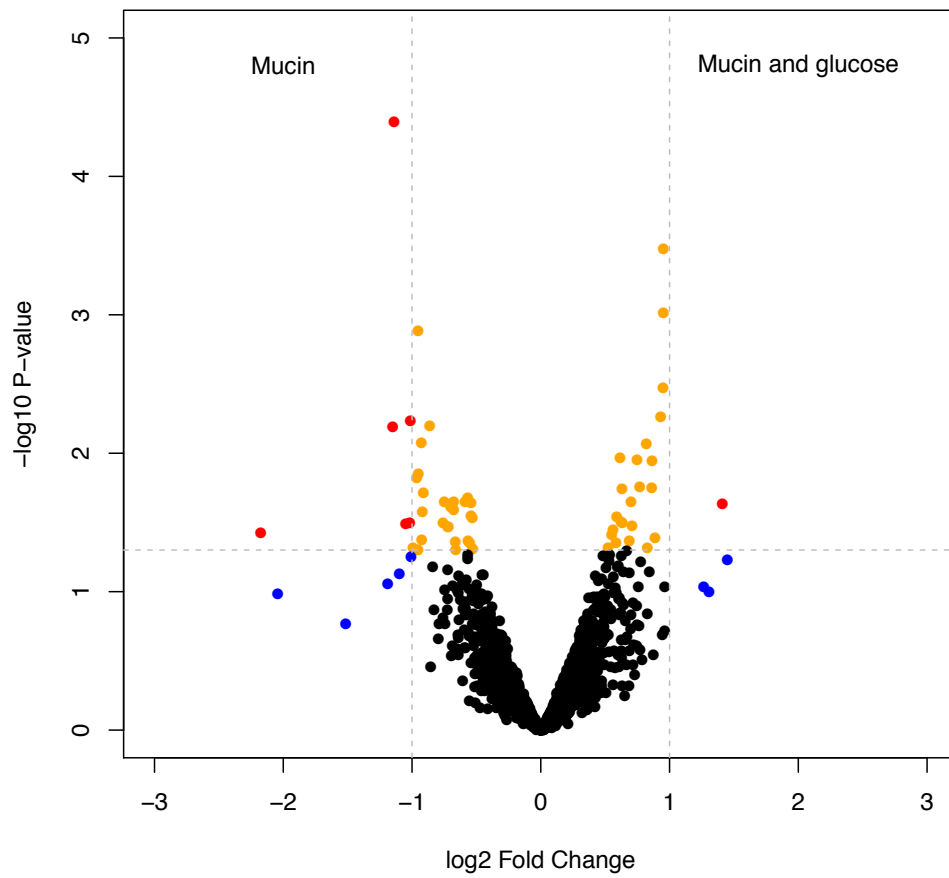

**FIG S4. Volcano plot of the distribution of gene expression for *A. muciniphila* grown on mucin vs. mixture of mucin and glucose.** Positive fold change indicates upregulation in the mixture condition. Red data points indicate genes having  $p < 0.05$  and fold change  $\geq 2$ .

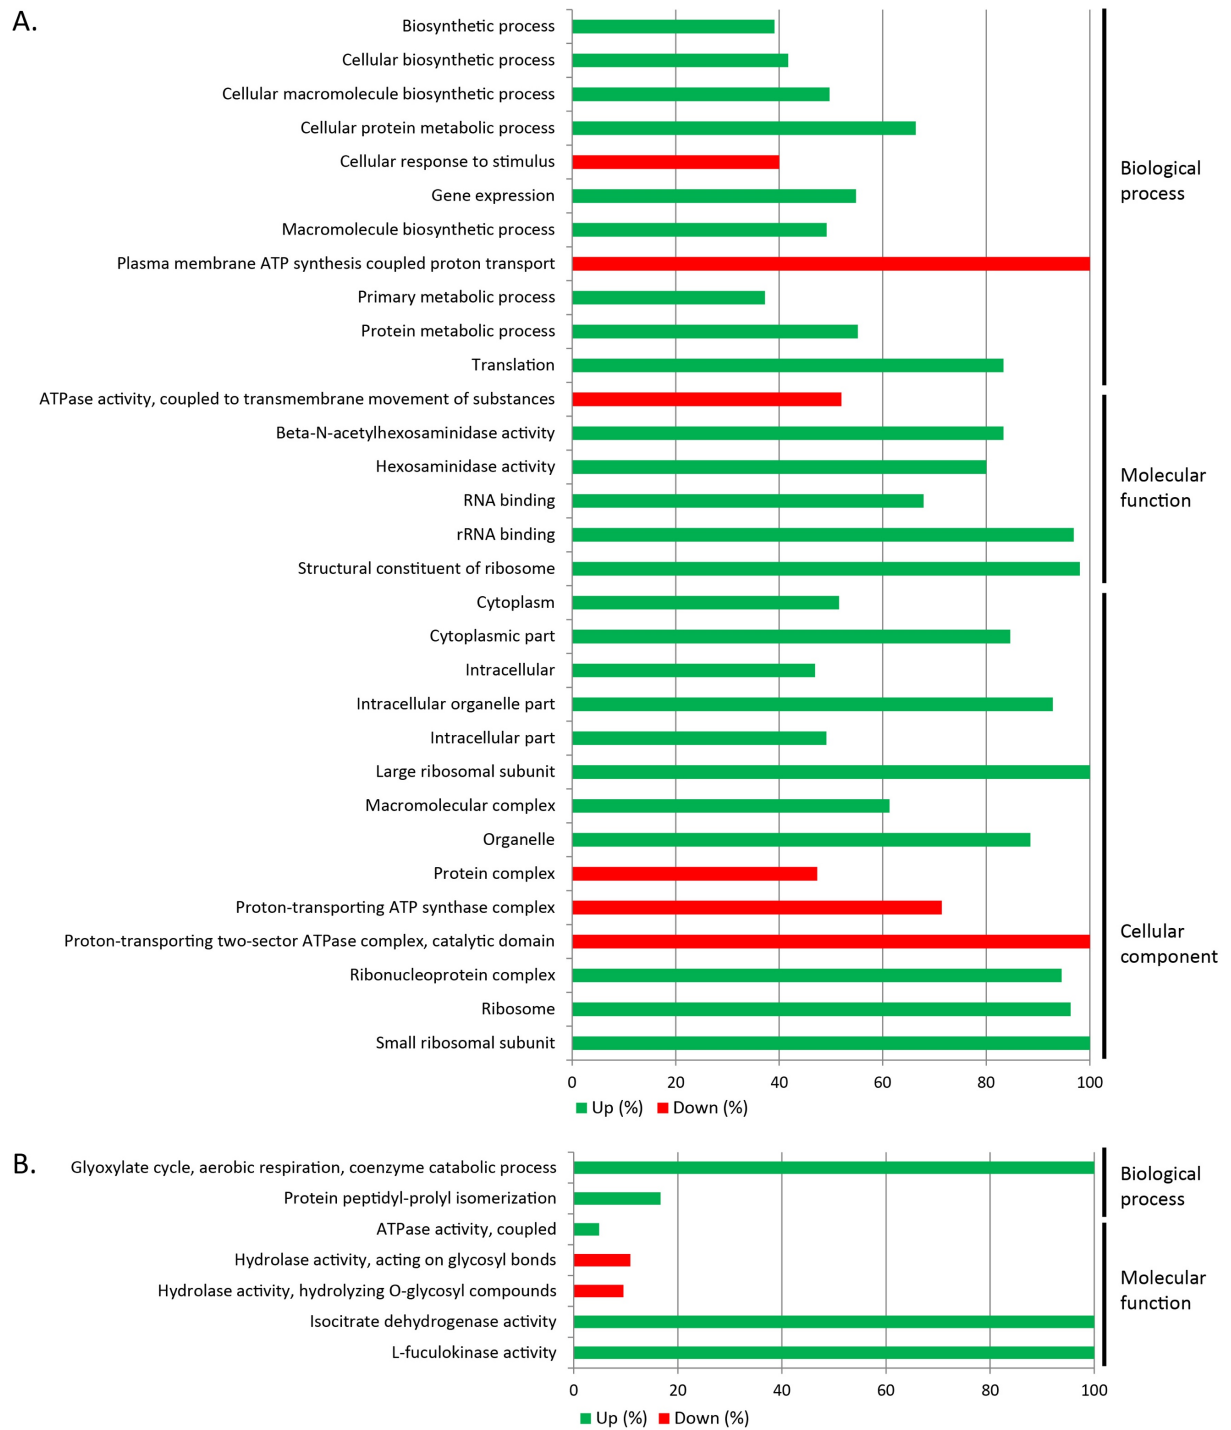

**FIG S5. Functionally grouped gene ontology of genes differentially expressed in mucin and glucose.** Each bar represents the ratio of the number of differentially expressed genes belonging to the GO terms shown in the y-axis. (A) *A. muciniphila* grown on mucin vs. glucose. Green, upregulated in mucin; red, downregulated in mucin. (B) *A. muciniphila* grown on mucin vs. mixture (mucin+glucose). Green, upregulated in mixture; red, downregulated in mixture.

|                                     | Acetate   |            | Propionate |            | Succinate |           | 1,2-propanediol |           |
|-------------------------------------|-----------|------------|------------|------------|-----------|-----------|-----------------|-----------|
|                                     | 10-12 h   | 24 h       | 10-12 h    | 24 h       | 10-12 h   | 24 h      | 10-12 h         | 24 h      |
| <b>Mucin 0.5 %</b>                  | 6.1 ± 2.4 | 17.1 ± 3.6 | 4.1 ± 2.3  | 12.4 ± 3.6 | 1.8 ± 1.0 | 0.1 ± 0.1 | 0.0 ± 0.0       | 0.7 ± 0.1 |
| <b>Glucose 10 mM / mucin 0.25 %</b> | 6.0 ± 3.7 | 12.2 ± 3.0 | 3.1 ± 4.0  | 12.8 ± 5.0 | 2.0 ± 0.6 | 1.1 ± 0.5 | 0.1 ± 0.1       | 0.1 ± 0.2 |

**Table S1.** Fermentation end products of *A. muciniphila* during growth on different substrates.

Samples were obtained during mid-exponential phase (~10-12 h incubation, used for transcriptome analysis) and in stationary phase (24 h incubation). Values represent means of triplicate cultures with standard deviations. N.D., not detected.

|                                     | Glucose    |            | Fucose    |      | Galactose |           |
|-------------------------------------|------------|------------|-----------|------|-----------|-----------|
|                                     | 10-12 h    | 24 h       | 10-12 h   | 24 h | 10-12 h   | 24 h      |
| <b>Mucin 0.5 %</b>                  | N.D.       | N.D.       | 0.1 ± 0.1 | N.D. | 0.1 ± 0.1 | N.D.      |
| <b>Glucose 10 mM / mucin 0.25 %</b> | -1.7 ± 0.6 | -8.3 ± 0.0 | N.D.      | N.D. | 0.3 ± 0.2 | 0.0 ± 0.1 |

**Table S2.** Degradation of sugars in *A. muciniphila* cultures during growth on different substrates. Values represent means of triplicate cultures with standard deviations. N.D., not detected.

|                      | Glucose    |             | Acetate   |           | Propionate |           | Succinate |           |
|----------------------|------------|-------------|-----------|-----------|------------|-----------|-----------|-----------|
|                      | 32-33 h    | 48 h        | 32-33 h   | 48 h      | 32-33 h    | 48 h      | 32-33 h   | 48 h      |
| <b>Glucose 20 mM</b> | -4.9 ± 0.9 | -11.5 ± 2.8 | 1.7 ± 0.7 | 5.5 ± 0.6 | 1.6 ± 0.1  | 8.0 ± 0.9 | 0.6 ± 0.1 | 1.8 ± 0.2 |

**Table S3.** Glucose degradation and fermentation end products of *A. muciniphila* during growth on glucose. Samples were obtained during mid-exponential phase (~32-33 h incubation, used for transcriptome analysis) and in stationary phase (48 h incubation). Values represent means of triplicate cultures with standard deviations.

|                                                     | Glucose  |          |          | Mucin    |          |          | Mucin + glucose |          |          |
|-----------------------------------------------------|----------|----------|----------|----------|----------|----------|-----------------|----------|----------|
|                                                     | 1        | 2        | 3        | 1        | 2        | 3        | 1               | 2        | 3        |
| Total no. of reads                                  | 11047878 | 10545771 | 18497197 | 11645389 | 17180153 | 11743614 | 16724960        | 14660237 | 17949331 |
| Total no. of reads mapped to the genome             | 10302029 | 10206943 | 17953823 | 11459340 | 16915727 | 11596495 | 16215886        | 14271680 | 17217612 |
| Percentage of reads mapped to the genome            | 93.2     | 96.8     | 97.1     | 98.4     | 98.5     | 98.7     | 97.0            | 97.3     | 95.9     |
| Total no. of reads mapped to protein coding regions | 7063596  | 6904150  | 12096349 | 8399083  | 11766433 | 8157964  | 12130637        | 9767040  | 11811538 |

**Table S4.** Summary of the RNA-Seq raw data analysis for transcriptome analysis of *A. muciniphila* grown on glucose, mucin and a mixture of mucin and glucose.
